# Supplementary material for: Evaluating the ability of end-point methods to predict the binding affinity tendency of protein kinase inhibitors
Source: Royal Society of Chemistry journal article supplement (doi:10.1039/d3ra04916g), 2023-01-01
Supplement: d3ra04916g1.pdf [file d3ra04916g1.pdf]

## Supplementary Material

**Table S1.** The PDB entries of the evaluated systems, protein names, mutation remarks, the experimental binding affinity data, and references.

| PDB entry | Protein Kinase | Ligand | Remarks            | Missing regions close to the binding site | $\Delta G_{exp}$ (kcal/mol) | References |
|-----------|----------------|--------|--------------------|-------------------------------------------|-----------------------------|------------|
| 2ity      | EGFR           | IRE    | WT                 | 866-875                                   | -9.90                       | [1]        |
| 2ito      | EGFR           | IRE    | MUT (G719S)        | 867-875                                   | -9.41                       | [1]        |
| 2itz      | EGFR           | IRE    | MUT (L858R)        | 866-875                                   | -11.69                      | [1]        |
| 2j6m      | EGFR           | AEE    | WT                 | No                                        | -10.84                      | [1]        |
| 2itp      | EGFR           | AEE    | MUT (G719S)        | No                                        | -10.82                      | [1]        |
| 2itt      | EGFR           | AEE    | MUT (L858R)        | 865-866                                   | -11.94                      | [1]        |
| 5cav      | EGFR           | 4ZQ    | WT                 | No                                        | -9.08                       | [2]        |
| 5cas      | EGFR           | 4ZQ    | MUT (T790M, L858R) | 999-1006                                  | -12.06                      | [2]        |
| 5em8      | EGFR           | 5Q4    | WT                 | 747-749                                   | -8.12                       | [3]        |
| 5em7      | EGFR           | 5Q4    | MUT (T790M, L858R) | 747-749                                   | -10.52                      | [3]        |

$\Delta G_{exp}$  values were determined using experimental  $K_i$  and  $K_d$  values for each system present in references.

**Table S2.** Average RMSD and Rg values of the EGRF-inhibitor systems.

| <b>Systems</b> | <b>RMSD</b> | <b>Rg</b>    |
|----------------|-------------|--------------|
| 2ity           | 3.25 ± 0.21 | 20.72 ± 0.14 |
| 2ito           | 3.50 ± 0.19 | 20.70 ± 0.12 |
| 2itz           | 3.12 ± 0.25 | 20.82 ± 0.11 |
| 2j6m           | 2.05 ± 0.20 | 20.04 ± 0.09 |
| 2itp           | 2.32 ± 0.38 | 19.99 ± 0.20 |
| 2itt           | 2.08 ± 0.27 | 19.99 ± 0.12 |
| 5cav           | 4.78 ± 0.21 | 20.70 ± 0.14 |
| 5cas           | 4.95 ± 0.35 | 20.89 ± 0.09 |
| 5em8           | 4.32 ± 0.56 | 20.40 ± 0.15 |
| 5em7           | 5.52 ± 0.55 | 22.23 ± 0.21 |

**Table S3.** RMSD of the cocrystallized ligand into the protein-ligand systems.

| <b>Systems</b> | <b>RMSD<sub>MD-first-25ns</sub></b> | <b>RMSD<sub>MD-last-50ns</sub></b> | <b>RMSD<sub>MOE</sub></b> | <b>RMSD<sub>SWDOCK</sub></b> |
|----------------|-------------------------------------|------------------------------------|---------------------------|------------------------------|
| 2ity           | 0.99                                | 0.95                               | 2.40                      | 2.50                         |
| 2ito           | 1.01                                | 1.29                               | 1.70                      | 2.50                         |
| 2itz           | 0.83                                | 0.97                               | 1.10                      | 1.00                         |
| 2j6m           | 1.93                                | 0.88                               | 2.30                      | 0.60                         |
| 2itp           | 0.71                                | 1.01                               | 2.45                      | 2.00                         |
| 2itt           | 0.49                                | 0.90                               | 1.36                      | 1.10                         |
| 5cav           | 1.01                                | 1.34                               | 1.40                      | 2.50                         |
| 5cas           | 0.50                                | 0.95                               | 1.36                      | 0.60                         |
| 5em8           | 1.12                                | 0.95                               | 1.90                      | 1.40                         |
| 5em7           | 1.23                                | 1.18                               | 2.00                      | 1.80                         |

This table describe the RMSD (Å) of the cocrystallized ligand during the first 25 (RMSD<sub>MD-first-25ns</sub>) and the last 50 ns (RMSD<sub>MD-last-50ns</sub>) of the 100-ns-long MD simulations, as well as the RMSD of docking calculations using MOE (RMSD<sub>MOE</sub>) or SWISSDOCK (RMSD<sub>SWDOCK</sub>).

**Table S4.** Binding free energy values for the protein-ligand systems during the first 25ns ( $\Delta G_{\text{gb-25ns}}$ ) using the MMGBSA approach (in units of kcal/mol).

| System | $\Delta E_{\text{vdw}}$ | $\Delta E_{\text{ele}}$ | $\Delta G_{\text{ele,sol}}$ | $\Delta G_{\text{npol,sol}}$ | $\Delta G_{\text{gb-25ns}}$ |
|--------|-------------------------|-------------------------|-----------------------------|------------------------------|-----------------------------|
| 2ity   | $-45.03 \pm 3.7$        | $-139.79 \pm 25.5$      | $154.14 \pm 23.4$           | $-5.75 \pm 0.63$             | $-36.43 \pm 4.6$            |
| 2ito   | $-50.31 \pm 3.3$        | $-136.72 \pm 16.3$      | $152.29 \pm 16.4$           | $-6.44 \pm 0.43$             | $-41.19 \pm 3.1$            |
| 2itz   | $-51.04 \pm 3.4$        | $-136.49 \pm 14.7$      | $153.03 \pm 13.6$           | $-6.47 \pm 0.43$             | $-40.98 \pm 4.0$            |
| 2j6m   | $-50.14 \pm 3.0$        | $24.36 \pm 4.4$         | $-11.41 \pm 5.0$            | $-6.13 \pm 0.28$             | $-43.32 \pm 3.5$            |
| 2itp   | $-52.34 \pm 3.3$        | $16.11 \pm 16.3$        | $-5.34 \pm 1.2$             | $-6.39 \pm 0.40$             | $-47.96 \pm 3.3$            |
| 2itt   | $-49.30 \pm 2.7$        | $18.93 \pm 11.3$        | $-7.65 \pm 1.9$             | $-5.99 \pm 0.37$             | $-44.08 \pm 3.1$            |
| 5cav   | $-51.51 \pm 2.5$        | $-34.75 \pm 6.2$        | $52.37 \pm 5.0$             | $-6.21 \pm 0.23$             | $-40.11 \pm 3.9$            |
| 5cas   | $-50.54 \pm 3.1$        | $-39.48 \pm 6.0$        | $47.89 \pm 5.2$             | $-6.46 \pm 0.25$             | $-48.59 \pm 5.0$            |
| 5em8   | $-49.02 \pm 4.3$        | $-147.59 \pm 18.9$      | $159.17 \pm 19.7$           | $-6.27 \pm 0.40$             | $-43.72 \pm 4.7$            |
| 5em7   | $-49.22 \pm 3.3$        | $-131.16 \pm 19.7$      | $144.23 \pm 19.5$           | $-6.10 \pm 0.33$             | $-42.25 \pm 3.6$            |

**Table S5.** Binding free energy values for the protein-ligand systems during last 50 ns ( $\Delta G_{\text{gb-50ns}}$ ) using the MMGBSA approach (in units of kcal/mol).

| Systems | $\Delta E_{\text{vdw}}$ | $\Delta E_{\text{ele}}$ | $\Delta G_{\text{ele,sol}}$ | $\Delta G_{\text{npol,sol}}$ | $\Delta G_{\text{gb-50ns}}$ |
|---------|-------------------------|-------------------------|-----------------------------|------------------------------|-----------------------------|
| 2ity    | $-48.02 \pm 3.0$        | $-162.68 \pm 17.0$      | $172.83 \pm 15.9$           | $-6.30 \pm 0.38$             | $-44.18 \pm 4.3$            |
| 2ito    | $-50.50 \pm 3.7$        | $-154.00 \pm 21.1$      | $168.00 \pm 18.5$           | $-6.63 \pm 0.45$             | $-43.13 \pm 4.1$            |
| 2itz    | $-48.03 \pm 3.1$        | $-148.99 \pm 16.4$      | $159.64 \pm 13.9$           | $-6.22 \pm 0.31$             | $-43.60 \pm 4.0$            |
| 2j6m    | $-49.72 \pm 3.3$        | $-10.82 \pm 2.1$        | $21.93 \pm 2.0$             | $-6.09 \pm 0.38$             | $-44.71 \pm 3.5$            |
| 2itp    | $-51.58 \pm 3.6$        | $8.02 \pm 3.1$          | $2.11 \pm 0.2$              | $-6.41 \pm 0.40$             | $-47.86 \pm 4.2$            |
| 2itt    | $-49.40 \pm 4.5$        | $24.62 \pm 5.5$         | $-14.07 \pm 4.5$            | $-6.09 \pm 0.60$             | $-44.94 \pm 5.6$            |
| 5cav    | $-49.18 \pm 3.2$        | $-36.46 \pm 7.5$        | $52.72 \pm 6.5$             | $-5.88 \pm 0.32$             | $-38.81 \pm 5.2$            |
| 5cas    | $-55.05 \pm 2.7$        | $-38.65 \pm 5.4$        | $45.89 \pm 4.3$             | $-6.80 \pm 0.21$             | $-54.61 \pm 4.0$            |
| 5em8    | $-42.27 \pm 4.3$        | $-98.91 \pm 19.2$       | $108.91 \pm 19.5$           | $-5.17 \pm 0.56$             | $-37.45 \pm 4.3$            |
| 5em7    | $-52.92 \pm 3.4$        | $-123.02 \pm 14.1$      | $137.16 \pm 14.3$           | $-6.37 \pm 0.36$             | $-45.15 \pm 4.0$            |

**Table S6.** Binding free energy values for the protein-ligand systems during the first 25ns ( $\Delta G_{pb-25ns}$ ) using the MMPBSA approach (in units of kcal/mol).

| Systems | $\Delta E_{vdw}$ | $\Delta E_{ele}$   | $\Delta G_{ele,sol}$ | $\Delta G_{npol,sol}$ | $\Delta G_{pb-25ns}$ |
|---------|------------------|--------------------|----------------------|-----------------------|----------------------|
| 2ity    | $-45.45 \pm 4.6$ | $-128.25 \pm 23.0$ | $148.96 \pm 23.7$    | $-4.67 \pm 0.31$      | $-29.41 \pm 6.7$     |
| 2ito    | $-47.15 \pm 4.2$ | $-139.15 \pm 18.9$ | $162.82 \pm 16.1$    | $-4.70 \pm 0.20$      | $-28.19 \pm 5.6$     |
| 2itz    | $-47.43 \pm 2.8$ | $-131.58 \pm 22.9$ | $153.63 \pm 19.0$    | $-4.54 \pm 0.17$      | $-29.92 \pm 5.2$     |
| 2j6m    | $-48.80 \pm 3.4$ | $7.32 \pm 1.8$     | $20.22 \pm 1.7$      | $-4.97 \pm 0.21$      | $-26.22 \pm 5.9$     |
| 2itp    | $-52.44 \pm 3.0$ | $4.64 \pm 1.6$     | $25.67 \pm 1.3$      | $-5.20 \pm 0.12$      | $-27.32 \pm 4.9$     |
| 2itt    | $-49.26 \pm 3.3$ | $27.83 \pm 2.1$    | $-0.16 \pm 0.01$     | $-4.99 \pm 0.23$      | $-26.57 \pm 4.0$     |
| 5cav    | $-52.95 \pm 2.9$ | $-28.37 \pm 9.4$   | $56.19 \pm 9.7$      | $-4.78 \pm 0.11$      | $-29.92 \pm 4.6$     |
| 5cas    | $-52.36 \pm 2.8$ | $-34.76 \pm 7.0$   | $53.43 \pm 5.5$      | $-4.67 \pm 0.07$      | $-38.37 \pm 3.9$     |
| 5em8    | $-50.74 \pm 3.2$ | $-137.77 \pm 26.4$ | $160.09 \pm 25.0$    | $-4.90 \pm 0.21$      | $-33.33 \pm 4.8$     |
| 5em7    | $-49.52 \pm 3.3$ | $-132.42 \pm 16.6$ | $154.68 \pm 17.0$    | $-4.73 \pm 0.20$      | $-31.99 \pm 3.9$     |

**Table S7.** Binding free energy values for the protein-ligand systems during the last 50ns ( $\Delta G_{pb-50ns}$ ) using the MMPBSA approach (in units of kcal/mol).

| System | $\Delta E_{vdw}$ | $\Delta E_{ele}$   | $\Delta G_{ele,sol}$ | $\Delta G_{npol,sol}$ | $\Delta G_{pb-50ns}$ |
|--------|------------------|--------------------|----------------------|-----------------------|----------------------|
| 2ity   | $-48.02 \pm 3.0$ | $-162.68 \pm 17.0$ | $179.75 \pm 15.0$    | $-4.79 \pm 0.14$      | $-35.75 \pm 5.5$     |
| 2ito   | $-50.50 \pm 3.7$ | $-154.00 \pm 21.0$ | $179.52 \pm 17.5$    | $-4.90 \pm 0.26$      | $-29.88 \pm 7.5$     |
| 2itz   | $-48.02 \pm 3.1$ | $-148.99 \pm 16.4$ | $169.13 \pm 13.0$    | $-4.70 \pm 0.17$      | $-32.59 \pm 5.2$     |
| 2j6m   | $-49.72 \pm 3.3$ | $-10.82 \pm 1.0$   | $40.14 \pm 22.7$     | $-5.08 \pm 0.20$      | $-25.48 \pm 4.7$     |
| 2itp   | $-51.58 \pm 3.6$ | $8.02 \pm 1.5$     | $18.35 \pm 1.5$      | $-4.96 \pm 0.30$      | $-30.17 \pm 5.0$     |
| 2itt   | $-49.40 \pm 4.5$ | $24.62 \pm 1.5$    | $1.32 \pm 0.15$      | $-4.94 \pm 0.34$      | $-28.39 \pm 5.5$     |
| 5cav   | $-49.18 \pm 3.2$ | $-36.46 \pm 7.5$   | $59.16 \pm 7.1$      | $-4.63 \pm 0.14$      | $-31.11 \pm 5.4$     |

|      |                  |                    |                   |                  |                  |
|------|------------------|--------------------|-------------------|------------------|------------------|
| 5cas | $-55.05 \pm 2.7$ | $-38.65 \pm 5.4$   | $57.31 \pm 5.5$   | $-4.76 \pm 0.09$ | $-41.16 \pm 3.9$ |
| 5em8 | $-42.27 \pm 4.3$ | $-98.91 \pm 19.3$  | $117.89 \pm 20.0$ | $-4.44 \pm 0.31$ | $-27.75 \pm 5.2$ |
| 5em7 | $-52.92 \pm 3.4$ | $-123.02 \pm 14.1$ | $143.10 \pm 15.0$ | $-4.82 \pm 0.20$ | $-37.67 \pm 3.8$ |

**Table S8.** Binding free energy values for the protein-ligand systems during the first 25ns considering the entropic component ( $\Delta G_{\text{gbds-25ns}}$ ) using the MMGBSA approach (in units of kcal/mol).

| Systems | $\Delta E_{\text{vdw}}$ | $\Delta E_{\text{ele}}$ | $\Delta G_{\text{ele,sol}}$ | $\Delta G_{\text{npol,sol}}$ | $\Delta G_{\text{rel-gb-5ns}}$ | -TDS             | $\Delta G_{\text{gbds-25ns}}$ |
|---------|-------------------------|-------------------------|-----------------------------|------------------------------|--------------------------------|------------------|-------------------------------|
| 2ity    | $-45.03 \pm 3.7$        | $-139.8 \pm 25.5$       | $154.14 \pm 23.4$           | $-5.75 \pm 0.63$             | $-36.43 \pm 4.6$               | $-27.51 \pm 8.9$ | -8.92                         |
| 2ito    | $-50.31 \pm 3.3$        | $-136.7 \pm 16.3$       | $152.29 \pm 16.4$           | $-6.44 \pm 0.43$             | $-41.19 \pm 3.1$               | $-28.92 \pm 4.2$ | -12.27                        |
| 2itz    | $-51.04 \pm 3.4$        | $-136.5 \pm 14.7$       | $153.03 \pm 13.6$           | $-6.47 \pm 0.43$             | $-40.98 \pm 4.0$               | $-24.11 \pm 4.7$ | -16.87                        |
| 2j6m    | $-50.14 \pm 3.0$        | $24.36 \pm 4.4$         | $-11.41 \pm 5.0$            | $-6.13 \pm 0.28$             | $-43.32 \pm 3.5$               | $-17.82 \pm 5.3$ | -25.5                         |
| 2itp    | $-52.34 \pm 3.3$        | $16.11 \pm 16.3$        | $-5.34 \pm 1.2$             | $-6.39 \pm 0.40$             | $-47.96 \pm 3.3$               | $-11.83 \pm 6.4$ | -36.13                        |
| 2itt    | $-49.3 \pm 2.7$         | $18.93 \pm 11.3$        | $-7.65 \pm 1.9$             | $-5.99 \pm 0.37$             | $-44.08 \pm 3.1$               | $-21.07 \pm 4.2$ | -23.01                        |
| 5cav    | $-51.51 \pm 2.5$        | $-34.75 \pm 6.2$        | $52.37 \pm 5.0$             | $-6.21 \pm 0.23$             | $-40.11 \pm 3.9$               | $-20.90 \pm 4.9$ | -19.21                        |
| 5cas    | $-50.54 \pm 3.1$        | $-39.48 \pm 6.0$        | $47.89 \pm 5.2$             | $-6.46 \pm 0.25$             | $-48.59 \pm 5.0$               | $-20.79 \pm 4.2$ | -27.8                         |
| 5em8    | $-49.02 \pm 4.3$        | $-147.59 \pm 18.9$      | $159.17 \pm 19.7$           | $-6.27 \pm 0.40$             | $-43.72 \pm 4.7$               | $-18.47 \pm 2.3$ | -25.25                        |
| 5em7    | $-49.22 \pm 3.3$        | $-131.16 \pm 19.7$      | $144.23 \pm 19.5$           | $-6.10 \pm 0.33$             | $-42.25 \pm 3.6$               | $-16.29 \pm 7.0$ | -25.96                        |

**Table S9.** Binding free energy values for the protein-ligand systems during last 50 ns considering the entropic component ( $\Delta G_{\text{gbds-50ns}}$ ) using the MMGBSA approach (in units of kcal/mol).

| Systems | $\Delta E_{\text{vdw}}$ | $\Delta E_{\text{ele}}$ | $\Delta G_{\text{ele,sol}}$ | $\Delta G_{\text{npol,sol}}$ | $\Delta G_{\text{rel-gb-50ns}}$ | -TDS             | $\Delta G_{\text{gbds-50ns}}$ |
|---------|-------------------------|-------------------------|-----------------------------|------------------------------|---------------------------------|------------------|-------------------------------|
| 2ity    | $-48.02 \pm 3.0$        | $-162.68 \pm 17.0$      | $172.83 \pm 15.9$           | $-6.30 \pm 0.38$             | $-44.18 \pm 4.3$                | $-27.51 \pm 8.9$ | <b>-16.67</b>                 |
| 2ito    | $-50.50 \pm 3.7$        | $-154.00 \pm 21.1$      | $168.00 \pm 18.5$           | $-6.63 \pm 0.45$             | $-43.13 \pm 4.1$                | $-28.92 \pm 4.2$ | <b>-14.21</b>                 |
| 2itz    | $-48.03 \pm 3.1$        | $-148.99 \pm 16.4$      | $159.64 \pm 13.9$           | $-6.22 \pm 0.31$             | $-43.60 \pm 4.0$                | $-24.11 \pm 4.7$ | <b>-19.49</b>                 |
| 2j6m    | $-49.72 \pm 3.3$        | $-10.82 \pm 2.1$        | $21.93 \pm 2.0$             | $-6.09 \pm 0.38$             | $-44.71 \pm 3.5$                | $-17.82 \pm 5.4$ | <b>-26.89</b>                 |
| 2itp    | $-51.58 \pm 3.6$        | $8.02 \pm 3.1$          | $2.11 \pm 0.2$              | $-6.41 \pm 0.40$             | $-47.86 \pm 4.2$                | $-11.83 \pm 6.4$ | <b>-36.03</b>                 |
| 2itt    | $-49.40 \pm 4.5$        | $24.62 \pm 5.5$         | $-14.07 \pm 4.5$            | $-6.09 \pm 0.60$             | $-44.94 \pm 5.6$                | $-21.07 \pm 4.2$ | <b>-23.87</b>                 |
| 5cav    | $-49.18 \pm 3.2$        | $-36.46 \pm 7.5$        | $52.72 \pm 6.5$             | $-5.88 \pm 0.32$             | $-38.81 \pm 5.2$                | $-20.90 \pm 4.9$ | <b>-17.91</b>                 |
| 5cas    | $-55.05 \pm 2.7$        | $-38.65 \pm 5.4$        | $45.89 \pm 4.3$             | $-6.80 \pm 0.21$             | $-54.61 \pm 4.0$                | $-20.79 \pm 4.2$ | <b>-33.82</b>                 |
| 5em8    | $-42.27 \pm 4.3$        | $-98.91 \pm 19.2$       | $108.91 \pm 19.5$           | $-5.17 \pm 0.56$             | $-37.45 \pm 4.3$                | $-18.47 \pm 2.3$ | <b>-18.98</b>                 |
| 5em7    | $-52.92 \pm 3.4$        | $-123.02 \pm 14.1$      | $137.16 \pm 14.3$           | $-6.37 \pm 0.36$             | $-45.15 \pm 4.0$                | $-16.29 \pm 7.0$ | <b>-28.16</b>                 |



**Table S10.** Binding free energy values for the protein-ligand systems during the first 25ns considering the entropic component ( $\Delta G_{\text{pbds-25ns}}$ ) using the MMPBSA approach (in units of kcal/mol).

| System | $\Delta E_{\text{vdw}}$ | $\Delta E_{\text{ele}}$ | $\Delta G_{\text{ele,sol}}$ | $\Delta G_{\text{npol,sol}}$ | $\Delta G_{\text{rel-pb-5ns}}$ | -TDS             | $\Delta G_{\text{pbds-25ns}}$ |
|--------|-------------------------|-------------------------|-----------------------------|------------------------------|--------------------------------|------------------|-------------------------------|
| 2ity   | $-45.45 \pm 4.6$        | $-128.25 \pm 23.0$      | $148.96 \pm 23.7$           | $-4.67 \pm 0.31$             | $-29.41 \pm 6.7$               | $-27.51 \pm 8.9$ | <b>-1.9</b>                   |
| 2ito   | $-47.15 \pm 4.2$        | $-139.15 \pm 18.9$      | $162.82 \pm 16.1$           | $-4.70 \pm 0.20$             | $-28.19 \pm 5.6$               | $-28.92 \pm 4.2$ | <b>0.73</b>                   |
| 2itz   | $-47.43 \pm 2.8$        | $-131.58 \pm 22.9$      | $153.63 \pm 19.0$           | $-4.54 \pm 0.17$             | $-29.92 \pm 5.2$               | $-24.11 \pm 4.7$ | <b>-5.81</b>                  |
| 2j6m   | $-48.80 \pm 3.4$        | $7.32 \pm 1.8$          | $20.22 \pm 1.7$             | $-4.97 \pm 0.21$             | $-26.22 \pm 5.9$               | $-17.82 \pm 5.3$ | <b>-8.4</b>                   |
| 2itp   | $-52.44 \pm 3.0$        | $4.64 \pm 1.6$          | $25.67 \pm 1.3$             | $-5.20 \pm 0.12$             | $-27.32 \pm 4.9$               | $-11.83 \pm 6.4$ | <b>-15.49</b>                 |
| 2itt   | $-49.26 \pm 3.3$        | $27.83 \pm 2.1$         | $-0.16 \pm 0.01$            | $-4.99 \pm 0.23$             | $-26.57 \pm 4.0$               | $-21.07 \pm 4.2$ | <b>-5.5</b>                   |
| 5cav   | $-52.95 \pm 2.9$        | $-28.37 \pm 9.4$        | $56.19 \pm 9.7$             | $-4.78 \pm 0.11$             | $-29.92 \pm 4.6$               | $-20.90 \pm 4.9$ | <b>-9.02</b>                  |
| 5cas   | $-52.36 \pm 2.8$        | $-34.76 \pm 7.0$        | $53.43 \pm 5.5$             | $-4.67 \pm 0.07$             | $-38.37 \pm 3.9$               | $-20.79 \pm 4.2$ | <b>-17.58</b>                 |
| 5em8   | $-50.74 \pm 3.2$        | $-137.77 \pm 26.4$      | $160.09 \pm 25.0$           | $-4.90 \pm 0.21$             | $-33.33 \pm 4.8$               | $-18.47 \pm 2.3$ | <b>-14.86</b>                 |
| 5em7   | $-49.52 \pm 3.3$        | $-132.42 \pm 16.6$      | $154.68 \pm 17.0$           | $-4.73 \pm 0.20$             | $-31.99 \pm 3.9$               | $-16.29 \pm 7.0$ | <b>-15.7</b>                  |

**Table S11.** Binding free energy values for the protein-ligand systems during the last 50ns considering the entropic component ( $\Delta G_{\text{pbds-50ns}}$ ) using the MMPBSA approach (in units of kcal/mol).

| System | $\Delta E_{\text{vdw}}$ | $\Delta E_{\text{ele}}$ | $\Delta G_{\text{ele,sol}}$ | $\Delta G_{\text{npol,sol}}$ | $\Delta G_{\text{rel-pb-50ns}}$ | -TDS         | $\Delta G_{\text{pbds-50ns}}$ |
|--------|-------------------------|-------------------------|-----------------------------|------------------------------|---------------------------------|--------------|-------------------------------|
| 2ity   | -48.02 ± 3.0            | -162.68 ± 17.0          | 179.75 ± 15.0               | -4.79 ± 0.14                 | -35.75 ± 5.5                    | -27.51 ± 8.9 | <b>-8.24</b>                  |
| 2ito   | -50.50 ± 3.7            | -154.00 ± 21.0          | 179.52 ± 17.5               | -4.90 ± 0.26                 | -29.88 ± 7.5                    | -28.92 ± 4.2 | <b>-0.96</b>                  |
| 2itz   | -48.02 ± 3.1            | -148.99 ± 16.4          | 169.13 ± 13.0               | -4.70 ± 0.17                 | -32.59 ± 5.2                    | -24.11 ± 4.7 | <b>-8.48</b>                  |
| 2j6m   | -49.72 ± 3.3            | -10.82 ± 1.0            | 40.14 ± 22.7                | -5.08 ± 0.20                 | -25.48 ± 4.7                    | -17.82 ± 5.4 | <b>-7.66</b>                  |
| 2itp   | -51.58 ± 3.6            | 8.02 ± 1.5              | 18.35 ± 1.5                 | -4.96 ± 0.30                 | -30.17 ± 5.0                    | -11.83 ± 6.4 | <b>-18.34</b>                 |
| 2itt   | -49.40 ± 4.5            | 24.62 ± 1.5             | 1.32 ± 0.15                 | -4.94 ± 0.34                 | -28.39 ± 5.5                    | -21.07 ± 4.2 | <b>-7.32</b>                  |
| 5cav   | -49.18 ± 3.2            | -36.46 ± 7.5            | 59.16 ± 7.1                 | -4.63 ± 0.14                 | -31.11 ± 5.4                    | -20.90 ± 4.9 | <b>-10.21</b>                 |
| 5cas   | -55.05 ± 2.7            | -38.65 ± 5.4            | 57.31 ± 5.5                 | -4.76 ± 0.09                 | -41.16 ± 3.9                    | -20.79 ± 4.2 | <b>-20.37</b>                 |
| 5em8   | -42.27 ± 4.3            | -98.91 ± 19.3           | 117.89 ± 20.0               | -4.44 ± 0.31                 | -27.75 ± 5.2                    | -18.47 ± 2.3 | <b>-9.28</b>                  |
| 5em7   | -52.92 ± 3.4            | -123.02 ± 14.1          | 143.10 ± 15.0               | -4.82 ± 0.20                 | -37.67 ± 3.8                    | -16.29 ± 7.0 | <b>-21.38</b>                 |

**Table S12.** Binding free energy values (in kcal/mol) for the protein–ligand systems during the first

| System | $\Delta G_{\text{gb-25ns}}$ | $\Delta G_{\text{gb-50ns}}$ | $\Delta G_{\text{pb-25ns}}$ | $\Delta G_{\text{pb-50ns}}$ | $\Delta G_{\text{gbds-25ns}}$ | $\Delta G_{\text{gbds-50ns}}$ | $\Delta G_{\text{pbds-25ns}}$ | $\Delta G_{\text{pbds-50ns}}$ |
|--------|-----------------------------|-----------------------------|-----------------------------|-----------------------------|-------------------------------|-------------------------------|-------------------------------|-------------------------------|
| 2ity   | -36.43 ± 4.6                | -44.18 ± 4.3                | -29.41 ± 6.7                | -35.75 ± 5.5                | -8.92                         | -16.67                        | -1.9                          | -8.24                         |
| 2ito   | -41.19 ± 3.1                | -43.13 ± 4.1                | -28.19 ± 5.6                | -29.88 ± 7.5                | -12.27                        | -14.21                        | 0.73                          | -0.96                         |
| 2itz   | -40.98 ± 4.0                | -43.60 ± 4.0                | -29.92 ± 5.2                | -32.59 ± 5.2                | -16.87                        | -19.49                        | -5.81                         | -8.48                         |
| 2j6m   | -43.32 ± 3.5                | -44.71 ± 3.5                | -26.22 ± 5.9                | -25.48 ± 4.7                | -25.5                         | -26.89                        | -8.4                          | -7.66                         |
| 2itp   | -47.96 ± 3.3                | -47.86 ± 4.2                | -27.32 ± 4.9                | -30.17 ± 5.0                | -36.13                        | -36.03                        | -15.49                        | -18.34                        |
| 2itt   | -44.08 ± 3.1                | -44.94 ± 5.6                | -26.57 ± 4.0                | -28.39 ± 5.5                | -23.01                        | -23.87                        | -5.5                          | -7.32                         |
| 5cav   | -40.11 ± 3.9                | -38.81 ± 5.2                | -29.92 ± 4.6                | -31.11 ± 5.4                | -19.21                        | -17.91                        | -9.02                         | -10.21                        |
| 5cas   | -48.59 ± 5.0                | -54.61 ± 4.0                | -38.37 ± 3.9                | -41.16 ± 3.9                | -27.8                         | -33.82                        | -17.58                        | -20.37                        |
| 5em8   | -43.72 ± 4.7                | -37.45 ± 4.3                | -33.33 ± 4.8                | -27.75 ± 5.2                | -25.25                        | -18.98                        | -14.86                        | -9.28                         |
| 5em7   | -42.25 ± 3.6                | -45.15 ± 4.0                | -31.99 ± 3.9                | -37.67 ± 3.8                | -25.96                        | -28.16                        | -15.7                         | -21.38                        |

5 ns and the last 50 ns using the MMGBSA or MMPBSA approach.

Binding free energy values obtained during the first 25 or the last 50 ns using MMGBSA ( $\Delta G_{\text{gb-25ns}}$  or  $\Delta G_{\text{gb-50ns}}$ ) or MMPBSA ( $\Delta G_{\text{pb-25ns}}$  or  $\Delta G_{\text{pb-50ns}}$ ) approach. Values obtained during the first 25 ns or the last 50 ns using the MMGBSA ( $\Delta G_{\text{gbds-25ns}}$  or  $\Delta G_{\text{gbds-50ns}}$ ) or MMPBSA ( $\Delta G_{\text{pbds-25ns}}$  or  $\Delta G_{\text{pbds-50ns}}$ ) approach.

**Table S13.**  $\Delta G_{\text{docking}}$  values (in kcal/mol) for the protein–ligand systems using two different docking programs.  $\Delta G$  values obtained using MOE ( $\Delta G_{\text{MOE}}$ ), and SwissDock ( $\Delta G_{\text{SWDOCK}}$ ).

| <b>PDB entry</b> | <b><math>\Delta G_{\text{MOE}}</math></b> | <b><math>\Delta G_{\text{SWDOCK}}</math></b> |
|------------------|-------------------------------------------|----------------------------------------------|
| 4wa9             | -7.0                                      | -9.86                                        |
| 4twp             | -9.14                                     | -9.5                                         |
| 2ity             | -7.24                                     | -8.98                                        |
| 2ito             | -7.02                                     | -9.01                                        |
| 2itz             | -6.27                                     | -8.86                                        |
| 2j6m             | -5.58                                     | -10.35                                       |
| 2itp             | -7.53                                     | -8.74                                        |
| 2itt             | -7.95                                     | -9.74                                        |
| 5cav             | -6.85                                     | -8.28                                        |
| 5cas             | -7.16                                     | -9.6                                         |
| 5em8             | -5.78                                     | -9.9                                         |
| 5em7             | -6.18                                     | -10.77                                       |
| 4eor             | -7.48                                     | -8.55                                        |
| 4eok             | -7.07                                     | -8.0                                         |
| 1xh4             | -12.97                                    | -14.92                                       |
| 1xh9             | -13.27                                    | -15.85                                       |
| 3g0e             | -6.97                                     | -8.38                                        |
| 3g0f             | -6.30                                     | -8.03                                        |
| 5am6             | -6.37                                     | -9.08                                        |
| 5am7             | -6.37                                     | -8.03                                        |
| 4cli             | -6.16                                     | -8.40                                        |
| 4clj             | -6.60                                     | -8.99                                        |

## References

1. Yun, C.-H.; Boggon, T. J.; Li, Y.; Woo, M. S.; Greulich, H.; Meyerson, M.; Eck, M. J. Structures of Lung Cancer-Derived EGFR Mutants and Inhibitor Complexes: Mechanism of Activation and Insights into Differential Inhibitor Sensitivity. *Cancer Cell* 2007, 11 (3), 217–227.
2. Heald, R.; Bowman, K. K.; Bryan, M. C.; Burdick, D.; Chan, B.; Chan, E.; Chen, Y.; Clausen, S.; Dominguez-Fernandez, B.; Eigenbrot, C.; Elliott, R.; Hanan, E. J.; Jackson, P.; Knight, J.; La, H.; Lainchbury, M.; Malek, S.; Mann, S.; Merchant, M.; Mortara, K.; Purkey, H.; Schaefer, G.; Schmidt, S.; Seward, E.; Sideris, S.; Shao, L.; Wang, S.; Yeap, K.; Yen, I.; Yu, C.; Heffron, T. P. Noncovalent Mutant Selective Epidermal Growth Factor Receptor Inhibitors: A Lead Optimization Case Study. *J. Med. Chem.* 2015, 58 (22), 8877–8895.
3. Bryan, M. C.; Burdick, D. J.; Chan, B. K.; Chen, Y.; Clausen, S.; Dotson, J.; Eigenbrot, C.; Elliott, R.; Hanan, E. J.; Heald, R.; Jackson, P.; La, H.; Lainchbury, M.; Malek, S.; Mann, S. E.; Purkey, H. E.; Schaefer, G.; Schmidt, S.; Seward, E.; Sideris, S.; Wang, S.; Yen, I.; Yu, C.; Heffron, T. P. Pyridones as Highly Selective, Noncovalent Inhibitors of T790M Double Mutants of EGFR. *ACS Med. Chem. Lett.* 2016, 7 (1), 100–104. <https://doi.org/10.1021/acsmchemlett.5b00428>.
